# Supplementary material for: Effect of phosphonium based ionic liquid on structural, electrochemical and thermal behaviour of polymer poly(ethylene oxide) containing salt lithium bis(trifluoromethylsulfonyl)imide
Source: Royal Society of Chemistry journal article supplement (doi:10.1039/c6ra20393k), 2016-01-01
Supplement: c6ra20393k1.pdf [file c6ra20393k1.pdf]

**Effect of phosphonium based Ionic liquid on structural, electrochemical and thermal  
behaviour of polymer poly(ethylene oxide) containing salt lithium  
bis(trifluoromethylsulfonyl)imide**

Himani Gupta<sup>a</sup>, Shalu<sup>a</sup>, Liton Balo<sup>a</sup>, Varun Kumar Singh<sup>a</sup>, Sujeet Kumar Chaurasia<sup>b</sup> and  
Rajendra Kumar Singh<sup>\*a</sup>

- a. Ionic liquid and solid state ionic lab, Department of physics, Banaras Hindu University, Varansi-221005, India, Email: rksingh\_17@rediffmail.com and rajendrasingh.bhu@gmail.com, Fax: +915422368390, Tel. No. +915422307308*
- b. Department of Physics and Astrophysics, University of Delhi, Delhi-110007, India.*

**Supporting information:**

**FTIR analysis :**

FTIR spectroscopy has been used to investigate the interaction of IL cation and salt (LiTFSI) with polymer backbone and to observe the conformational change in PEO polymer matrix due to incorporation of IL. The FTIR spectra of PEO, IL and PEO + 20wt% LiTFSI + Xwt% IL (for X = 0, 10) are given in region 3200-400 cm<sup>-1</sup> as shown in Fig.S1. For present discussion, two regions (1000-1200 cm<sup>-1</sup> and 2800-3000 cm<sup>-1</sup>) of FTIR spectra are of particular interest. As we found some significant changes only in these regions. The expanded region 1000-1200 cm<sup>-1</sup> is given in Fig.S2. In this region, the peak related to C-O-C stretching of PEO was found at 1060 cm<sup>-1</sup> and 1146 cm<sup>-1</sup>.<sup>[R(1)-R(2)]</sup> When 20wt% salt LiTFSI was mixed in polymer (PEO) to obtain polymer electrolyte film (PEO + 20wt% LiTFSI), the interaction of LiTFSI salt cation (Li<sup>+</sup>) occurred with five ether oxygen of PEO chain as depicted in Fig.S3.<sup>[R(3)]</sup> Li<sup>+</sup> moves in polymer matrix by two processes (1) by hopping mechanism, (2) by diffusion mechanism. In hopping mechanism, Li<sup>+</sup> interacts with five ether oxygen of PEO and moves in polymer matrix by hopping at ether oxygen as shown in Fig.

S3. In diffusion mechanism,  $\text{Li}^+$  does not attach with ether oxygen of PEO matrix.<sup>[R(4)]</sup> Due to the interaction of LiTFSI salt cation ( $\text{Li}^+$ ) with the ether oxygen (C-O-C group) of PEO, shift in C-O-C related band of PEO was observed. It was found that C-O-C related peak of PEO shifted at  $1054\text{ cm}^{-1}$  and  $1033\text{ cm}^{-1}$  respectively when 20wt% of LiTFSI salt was incorporated in polymer matrix PEO as shown in Fig.S2. This shows the interaction of salt cation ( $\text{Li}^+$ ) with C-O-C group of PEO. The above observation suggested that the  $\text{Li}^+$  moves in polymer matrix by hopping mechanism. When 10wt% IL was incorporated in PEO + 20wt% LiTFSI, the cation of IL (Trihexyltetradecylphosphonium) is most likely to interact with ether oxygen belonging to C-O-C group of polymer PEO. Due to the interaction of cation ring of IL with the ether oxygen of PEO, C-O-C related peak was shifted at  $1054\text{ cm}^{-1}$  and  $1033\text{ cm}^{-1}$  respectively as given in Table T<sub>1</sub>. This shows the interaction of IL cation ring with ether oxygen of PEO. Due to the IL cation interaction with PEO, shift in peak related to the C-H stretching of IL cation has also been observed. C-H stretching vibration related to the cation ring of IL was observed in the region  $2800\text{-}3000\text{ cm}^{-1}$  as given in Fig.S4. In this region, peak related to the C-H stretching of IL cation was found at  $2855\text{ cm}^{-1}$ ,  $2873\text{ cm}^{-1}$ ,  $2926\text{ cm}^{-1}$  and  $2958\text{ cm}^{-1}$ . When IL was incorporated in polymer matrix (PEO + 20wt% LiTFSI), C-H stretching peak of IL cation is shifted to  $2856\text{ cm}^{-1}$ ,  $2873\text{ cm}^{-1}$ ,  $2925\text{ cm}^{-1}$  and  $2957\text{ cm}^{-1}$  respectively as shown in Table T<sub>1</sub>. The shift in peak position of C-O-C group of PEO and C-H stretching of IL cation, when IL was incorporated in polymer matrix, conforms the interaction of IL cation to C-O-C group of polymer matrix.

## References:

- R(1). S. S. Rao, M. J. Reddy, E. L. Narsaiah and S. Rao, *J. Mater. Sci. Eng. B*, 1995, **33**, 173-177.
- R(2). T. Rajkumar and R. Rao, *Mater. Chem. Phys.*, 2008, **112**, 853-857.
- R(3). K. Xu, *Chem. Rev.*, 2004, **104**, 4303-4417.
- R(4). O. Borodin and G. D. Smith, *Macromolecules*, 2006, **39**, 1620-1629.

## Figure caption :

**Fig.S1:** FTIR spectra of (a) pure PEO, (b) PEO + 20wt% LiTFSI, (c) pure IL and (d) PEO + 20wt% LiTFSI + 10wt% IL electrolyte membrane in the region 4000 – 400  $\text{cm}^{-1}$ .

**Fig.S2:** FTIR spectra of (a) pure PEO, (b) PEO + 20wt% LiTFSI and (c) PEO + 20wt% LiTFSI + 10wt% IL electrolyte membrane in the region 1000 - 1200  $\text{cm}^{-1}$ .

**Fig.S3:** Schematic representation of attachment of Li ion with ether oxygen of polymer chain PEO.

**Fig.S4:** FTIR spectra of (a) pure IL, (b) PEO + 20wt% LiTFSI + 10wt% IL electrolyte membrane in the region 2800 – 3000  $\text{cm}^{-1}$ .

## Table caption :

**Table T<sub>1</sub>:** Change in C-O-C band of pure PEO, PEO + 20wt% LiTFSI and PEO + 20wt% LiTFSI + 10wt% IL with C – H stretching of IL cation.

Figures :

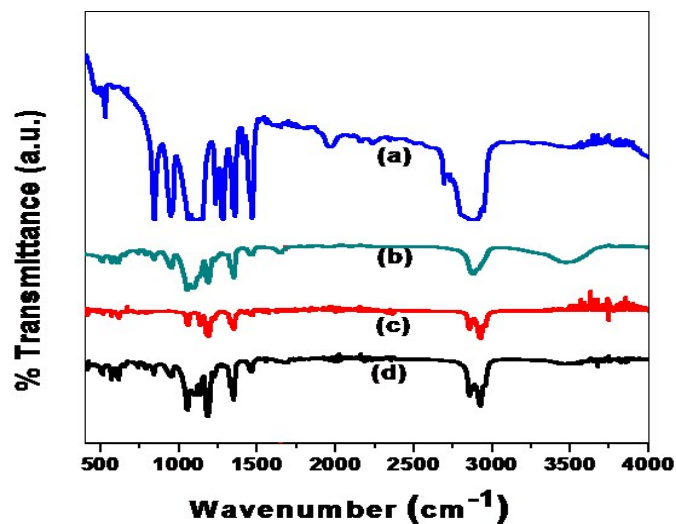

**Fig.S1:** FTIR spectra of (a) pure PEO, (b) PEO + 20wt% LiTFSI, (c) pure IL and (d) PEO + 20wt% LiTFSI + 10wt% IL electrolyte membrane in the region 4000 – 400 cm<sup>-1</sup>.

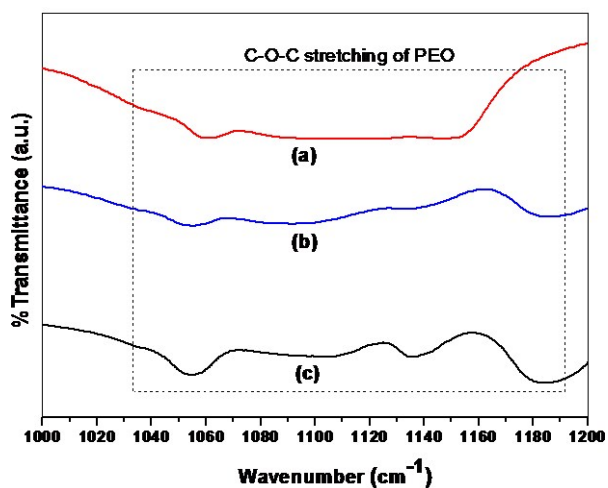

**Fig.S2:** FTIR spectra of (a) pure PEO, (b) PEO + 20wt% LiTFSI and (c) PEO + 20wt% LiTFSI + 10wt% IL electrolyte membrane in the region 1000 - 1200 cm<sup>-1</sup>.

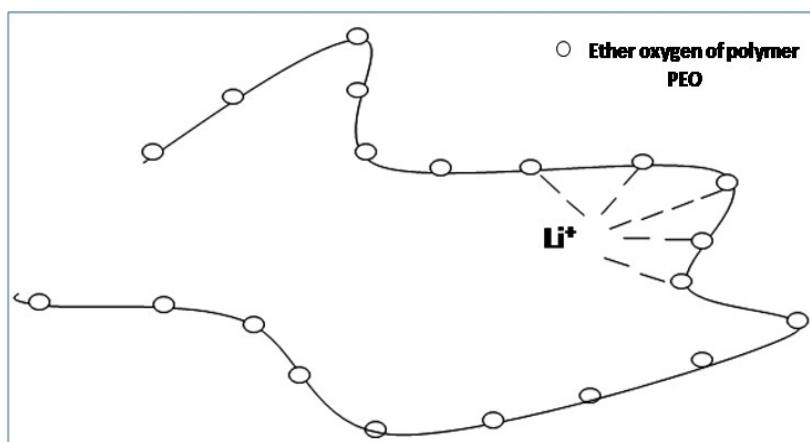

**Fig.S3:** Schematic representation of attachment of Li ion with ether oxygen of polymer chain PEO.

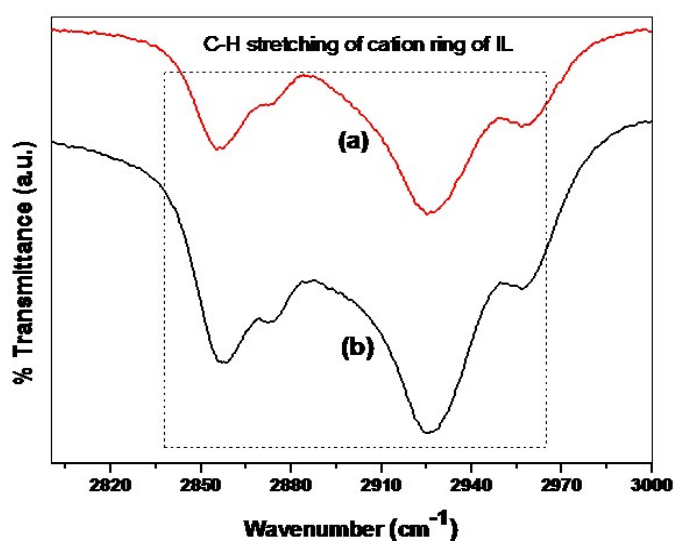

**Fig.S4:** FTIR spectra of (a) pure IL, (b) PEO + 20wt% LiTFSI + 10wt% IL electrolyte membrane in the region 2800 – 3000  $\text{cm}^{-1}$ .

Table :

| <b>Vibration mode</b>                       | <b>Pure PEO</b> | <b>Pure IL</b> | <b>PEO+20%LiTFSI</b> | <b>PEO+20%LiTFSI +10%IL</b> |
|---------------------------------------------|-----------------|----------------|----------------------|-----------------------------|
| <b>PEO related CH<sub>2</sub> vibration</b> | <b>843</b>      | <b>absent</b>  | <b>841</b>           | <b>841</b>                  |
|                                             | <b>947</b>      | <b>absent</b>  | <b>948</b>           | <b>945</b>                  |
| <b>PEO related C-O-C vibration</b>          | <b>1060</b>     | <b>absent</b>  | <b>1054</b>          | <b>1054</b>                 |
|                                             | <b>1146</b>     | <b>absent</b>  | <b>1133</b>          | <b>1135</b>                 |
| <b>IL related C-H stretching</b>            | <b>absent</b>   | <b>2855</b>    | <b>absent</b>        | <b>2856</b>                 |
|                                             | <b>absent</b>   | <b>2873</b>    | <b>absent</b>        | <b>2873</b>                 |
|                                             | <b>absent</b>   | <b>2926</b>    | <b>absent</b>        | <b>2925</b>                 |
|                                             | <b>absent</b>   | <b>2958</b>    | <b>absent</b>        | <b>2957</b>                 |

**Table T<sub>1</sub>:** Change in C-O-C band of pure PEO, PEO + 20wt% LiTFSI and PEO + 20wt% LiTFSI + 10wt% IL with C – H stretching of IL cation.
